# Supplementary material for: A Graphic Method for Identification of Novel Glioma Related Genes
Source: Hindawi journal article supplement (doi:10.1155/2014/891945), 2014-01-01
Supplement: f1 [file 891945.f1.zip]

**Supplementary Material I.** 77 glioma related genes

|          |          |          |         |         |
|----------|----------|----------|---------|---------|
| ACSL5    | DDR1     | GLTSCR2  | PANX2   | RGCC    |
| AKT1     | DMBT1    | H3F3A    | PAX6    | RIG     |
| AKT3     | EFNA1    | HIF1A    | PDCD4   | SDH5    |
| APC      | EFNA5    | IFITM1   | PEG3    | SDHB    |
| ARHGAP29 | EGFR     | IL2      | PLXNB3  | SDHC    |
| ATM      | EMC10    | KIAA1009 | PMS2    | SDHD    |
| BATF2    | EPHA2    | LGI1     | PRKCA   | SEMA5A  |
| BRCA2    | EPHB6    | LRIG3    | PRKCD   | SLC5A8  |
| CADM3    | ERBB2    | LRRN2    | PRKCI   | SP100   |
| CCL2     | FABP7    | MDM2     | PRKDC   | THEM4   |
| CDK6     | FLT1     | MMP2     | PTEN    | TMEM102 |
| CDK7     | FSCN1    | MSH2     | PTK2    | TP53    |
| CDKN2A   | FUBP1    | NBL1     | RAC1    | TRIM3   |
| CDKN2C   | GLI1     | NBS1     | RAF1    | VEGFC   |
| CIC      | GLTSCR1  | NF1      | RASSF10 | YEATS4  |
| COPEB    | GLTSCR1L |          |         |         |
