# Supplementary material for: A Graphic Method for Identification of Novel Glioma Related Genes
Source: Hindawi journal article supplement (doi:10.1155/2014/891945), 2014-01-01
Supplement: f1 [file 891945.f1.zip]

**Supplementary Material II.** 215 candidate genes with betweenness greater than 0 and their permutation FDRs

| <b>Ensemble ID of candidate gene</b> | <b>Gene name</b> | <b>Betweenness</b> | <b>Permutation FDR</b> |
|--------------------------------------|------------------|--------------------|------------------------|
| ENSP00000227638                      | PANX1            | 72                 | 0                      |
| ENSP00000235310                      | MAD2L2           | 72                 | 0                      |
| ENSP00000245323                      | EFNB2            | 335                | 0                      |
| ENSP00000258428                      | REV1             | 72                 | 0                      |
| ENSP00000265727                      | ADAM22           | 72                 | 0                      |
| ENSP00000281821                      | EPHA4            | 339                | 0                      |
| ENSP00000293831                      | EIF4A1           | 72                 | 0                      |
| ENSP00000302719                      | KCNAB3           | 72                 | 0                      |
| ENSP00000312697                      | DMAP1            | 88                 | 0                      |
| ENSP00000329797                      | CADM1            | 72                 | 0                      |
| ENSP00000335434                      | WDR20            | 72                 | 0                      |
| ENSP00000341138                      | EPB41L3          | 72                 | 0                      |
| ENSP00000351697                      | REV3L            | 72                 | 0                      |
| ENSP00000354778                      | CNTNAP2          | 72                 | 0                      |
| ENSP00000356150                      | MDM4             | 72                 | 0                      |
| ENSP00000357177                      | ARHGEF11         | 142                | 0                      |
| ENSP00000361366                      | SFTPD            | 72                 | 0                      |
| ENSP00000369218                      | RBM17            | 72                 | 0                      |
| ENSP00000370119                      | SMN2             | 72                 | 0                      |

|                 |        |     |       |
|-----------------|--------|-----|-------|
| ENSP00000245304 | RAP2A  | 72  | 0.001 |
| ENSP00000275815 | EPHA1  | 72  | 0.001 |
| ENSP00000328511 | KCNA4  | 72  | 0.001 |
| ENSP00000377446 | SUCLG1 | 210 | 0.001 |
| ENSP00000399511 | TNIK   | 72  | 0.001 |
| ENSP00000229595 | ASF1A  | 72  | 0.002 |
| ENSP00000252699 | ACTN4  | 72  | 0.002 |
| ENSP00000263208 | HIRA   | 72  | 0.002 |
| ENSP00000263923 | KDR    | 104 | 0.002 |
| ENSP00000304169 | PITX2  | 210 | 0.002 |
| ENSP00000330633 | CNTN2  | 72  | 0.002 |
| ENSP00000276072 | TAF1   | 72  | 0.003 |
| ENSP00000295600 | MITF   | 138 | 0.003 |
| ENSP00000360157 | FOXD3  | 6   | 0.003 |
| ENSP00000264010 | CTCF   | 72  | 0.004 |
| ENSP00000271628 | SF3B4  | 75  | 0.004 |
| ENSP00000350941 | SRC    | 421 | 0.004 |
| ENSP00000361125 | VEGFA  | 164 | 0.004 |
| ENSP00000226091 | EFNB3  | 67  | 0.006 |
| ENSP00000358309 | EPHA7  | 2   | 0.006 |
| ENSP00000358918 | SUFU   | 72  | 0.007 |
| ENSP00000316879 | EIF4G1 | 72  | 0.011 |

|                 |          |     |       |
|-----------------|----------|-----|-------|
| ENSP00000260653 | SIX3     | 2   | 0.012 |
| ENSP00000352516 | DNMT1    | 90  | 0.016 |
| ENSP00000358716 | DDX20    | 72  | 0.017 |
| ENSP00000357393 | EFNA3    | 50  | 0.018 |
| ENSP00000341680 | DTNBP1   | 66  | 0.02  |
| ENSP00000344456 | CTNNB1   | 607 | 0.02  |
| ENSP00000297904 | FIGF     | 2   | 0.021 |
| ENSP00000265165 | LEF1     | 134 | 0.022 |
| ENSP00000347948 | TNFRSF14 | 68  | 0.023 |
| ENSP00000288986 | NCK1     | 78  | 0.027 |
| ENSP00000261937 | FLT4     | 2   | 0.029 |
| ENSP00000333919 | BTLA     | 68  | 0.03  |
| ENSP00000332549 | GRIN2A   | 58  | 0.032 |
| ENSP00000376765 | PIAS3    | 4   | 0.033 |
| ENSP00000361818 | SDC4     | 1   | 0.035 |
| ENSP00000386165 | CEBPD    | 38  | 0.035 |
| ENSP00000348307 | SIRPA    | 34  | 0.036 |
| ENSP00000344666 | NF2      | 1   | 0.037 |
| ENSP00000219255 | PARD6A   | 72  | 0.038 |
| ENSP00000204961 | EFNB1    | 5   | 0.039 |
| ENSP00000172229 | NGFR     | 72  | 0.043 |
| ENSP00000344115 | CDH5     | 24  | 0.043 |

|                 |         |     |       |
|-----------------|---------|-----|-------|
| ENSP00000405041 | POU5F1  | 6   | 0.045 |
| ENSP00000360532 | CDC5L   | 6   | 0.046 |
| ENSP00000295897 | ALB     | 72  | 0.047 |
| ENSP00000340944 | PTPN11  | 112 | 0.047 |
| ENSP00000376076 | SUMO1   | 78  | 0.05  |
| ENSP00000227507 | CCND1   | 145 | 0.051 |
| ENSP00000318297 | RUVBL1  | 54  | 0.055 |
| ENSP00000356024 | CR2     | 72  | 0.055 |
| ENSP00000363763 | EPHB2   | 3   | 0.055 |
| ENSP00000281950 | GEMIN6  | 4   | 0.056 |
| ENSP00000257904 | CDK4    | 38  | 0.057 |
| ENSP00000233154 | NCK2    | 2   | 0.058 |
| ENSP00000368438 | PCNA    | 141 | 0.061 |
| ENSP00000245479 | SOX9    | 66  | 0.067 |
| ENSP00000370473 | IGFBP3  | 59  | 0.067 |
| ENSP00000269321 | ARHGDIA | 134 | 0.068 |
| ENSP00000304895 | IRS1    | 132 | 0.071 |
| ENSP00000400175 | RHOA    | 142 | 0.072 |
| ENSP00000357674 | SNAPIN  | 66  | 0.089 |
| ENSP00000323588 | SOX2    | 2   | 0.094 |
| ENSP00000401303 | SHC1    | 138 | 0.097 |
| ENSP00000332643 | NDN     | 5   | 0.102 |

|                 |          |     |       |
|-----------------|----------|-----|-------|
| ENSP00000358622 | IKBKG    | 72  | 0.102 |
| ENSP00000162330 | BCAR1    | 38  | 0.103 |
| ENSP00000309831 | SNUPN    | 68  | 0.107 |
| ENSP00000278568 | PAK1     | 24  | 0.114 |
| ENSP00000340691 | EIF4EBP1 | 36  | 0.114 |
| ENSP00000222005 | CDC37    | 1   | 0.128 |
| ENSP00000360266 | JUN      | 109 | 0.128 |
| ENSP00000313419 | CD19     | 72  | 0.132 |
| ENSP00000218388 | TIMP1    | 1   | 0.137 |
| ENSP00000244741 | CDKN1A   | 67  | 0.139 |
| ENSP00000280892 | EIF4E    | 72  | 0.143 |
| ENSP00000363804 | KLF4     | 3   | 0.145 |
| ENSP00000249636 | PIAS1    | 14  | 0.153 |
| ENSP00000359206 | BTRC     | 79  | 0.162 |
| ENSP00000302665 | IGF1     | 59  | 0.164 |
| ENSP00000365891 | WAS      | 11  | 0.168 |
| ENSP00000310491 | ARHGAP1  | 13  | 0.169 |
| ENSP00000223023 | WASL     | 50  | 0.17  |
| ENSP00000292303 | CCR5     | 54  | 0.18  |
| ENSP00000369757 | RPS6     | 12  | 0.181 |
| ENSP00000354586 | GLI2     | 2   | 0.185 |
| ENSP00000244007 | PLCG1    | 55  | 0.192 |

|                 |         |     |       |
|-----------------|---------|-----|-------|
| ENSP00000306512 | IL8     | 18  | 0.196 |
| ENSP00000338297 | IGF2    | 71  | 0.201 |
| ENSP00000364893 | ARHGEF7 | 28  | 0.203 |
| ENSP00000351486 | NTRK1   | 5   | 0.21  |
| ENSP00000279593 | GRIN2B  | 84  | 0.214 |
| ENSP00000314458 | CDC42   | 153 | 0.214 |
| ENSP00000302486 | MAP2K1  | 13  | 0.22  |
| ENSP00000330393 | LEPR    | 6   | 0.224 |
| ENSP00000354119 | LAT     | 2   | 0.238 |
| ENSP00000264972 | ZAP70   | 4   | 0.24  |
| ENSP00000324806 | GSK3B   | 147 | 0.25  |
| ENSP00000317714 | STX4    | 1   | 0.268 |
| ENSP00000263967 | PIK3CA  | 15  | 0.277 |
| ENSP00000254976 | SNAP25  | 66  | 0.28  |
| ENSP00000222139 | EPOR    | 1   | 0.286 |
| ENSP00000297261 | SHH     | 2   | 0.29  |
| ENSP00000303830 | INSR    | 22  | 0.292 |
| ENSP00000261023 | ITGAV   | 2   | 0.294 |
| ENSP00000357656 | FYN     | 88  | 0.299 |
| ENSP00000222254 | PIK3R2  | 2   | 0.302 |
| ENSP00000320935 | SLC2A4  | 1   | 0.317 |
| ENSP00000343204 | JAK1    | 8   | 0.325 |

|                 |          |     |       |
|-----------------|----------|-----|-------|
| ENSP00000368190 | NPHS1    | 2   | 0.344 |
| ENSP00000396127 | RAN      | 66  | 0.361 |
| ENSP00000353483 | MAPK8    | 98  | 0.364 |
| ENSP00000324897 | UBE2I    | 59  | 0.369 |
| ENSP00000335153 | HSP90AA1 | 47  | 0.378 |
| ENSP00000264033 | CBL      | 117 | 0.383 |
| ENSP00000267859 | BNIP2    | 22  | 0.39  |
| ENSP00000346839 | FN1      | 72  | 0.392 |
| ENSP00000342793 | PLD1     | 56  | 0.399 |
| ENSP00000262320 | AXIN1    | 1   | 0.404 |
| ENSP00000283195 | RANBP2   | 30  | 0.404 |
| ENSP00000230354 | TBP      | 72  | 0.405 |
| ENSP00000320940 | NCOA1    | 7   | 0.406 |
| ENSP00000282561 | GJA1     | 7   | 0.408 |
| ENSP00000346300 | CRKL     | 6   | 0.42  |
| ENSP00000258682 | CAMK2B   | 54  | 0.424 |
| ENSP00000046794 | LCP2     | 80  | 0.431 |
| ENSP00000228872 | CDKN1B   | 47  | 0.433 |
| ENSP00000221494 | SF3A2    | 147 | 0.436 |
| ENSP00000011653 | CD4      | 54  | 0.439 |
| ENSP00000356713 | IFNGR1   | 2   | 0.439 |
| ENSP00000231509 | NR3C1    | 8   | 0.447 |

|                 |         |     |       |
|-----------------|---------|-----|-------|
| ENSP00000350283 | BRCA1   | 78  | 0.455 |
| ENSP00000348577 | RANGAP1 | 36  | 0.46  |
| ENSP00000304903 | CD2BP2  | 83  | 0.474 |
| ENSP00000326366 | PSEN1   | 72  | 0.486 |
| ENSP00000359424 | CHUK    | 5   | 0.489 |
| ENSP00000222812 | STX1A   | 65  | 0.507 |
| ENSP00000261799 | PDGFRB  | 69  | 0.508 |
| ENSP00000358490 | CD2     | 83  | 0.508 |
| ENSP00000268035 | IGF1R   | 15  | 0.51  |
| ENSP00000274255 | SKP2    | 3   | 0.511 |
| ENSP00000312652 | LEP     | 72  | 0.518 |
| ENSP00000302269 | VAV1    | 37  | 0.519 |
| ENSP00000337825 | LCK     | 110 | 0.535 |
| ENSP00000221930 | TGFB1   | 20  | 0.54  |
| ENSP00000274335 | PIK3R1  | 7   | 0.546 |
| ENSP00000283635 | CD8A    | 13  | 0.547 |
| ENSP00000267163 | RB1     | 28  | 0.552 |
| ENSP00000378338 | GIT1    | 3   | 0.554 |
| ENSP00000387699 | CREB1   | 55  | 0.572 |
| ENSP00000215829 | SNRPD3  | 4   | 0.574 |
| ENSP00000384675 | SOS1    | 11  | 0.578 |
| ENSP00000216797 | NFKBIA  | 26  | 0.585 |



|                 |          |     |       |
|-----------------|----------|-----|-------|
| ENSP00000265171 | EGF      | 8   | 0.588 |
| ENSP00000326804 | CUL1     | 3   | 0.592 |
| ENSP00000003084 | CFTR     | 65  | 0.608 |
| ENSP00000264657 | STAT3    | 210 | 0.616 |
| ENSP00000362649 | HDAC1    | 71  | 0.62  |
| ENSP00000226574 | NFKB1    | 7   | 0.631 |
| ENSP00000354558 | MTOR     | 24  | 0.632 |
| ENSP00000361626 | YBX1     | 55  | 0.633 |
| ENSP00000380227 | ITGA4    | 42  | 0.638 |
| ENSP00000262613 | SLC9A3R1 | 65  | 0.64  |
| ENSP00000356346 | PTPRC    | 11  | 0.645 |
| ENSP00000274376 | RASA1    | 1   | 0.655 |
| ENSP00000309845 | HRAS     | 12  | 0.66  |
| ENSP00000348986 | INS-IGF2 | 25  | 0.671 |
| ENSP00000268182 | IQGAP1   | 18  | 0.683 |
| ENSP00000306245 | FOS      | 2   | 0.698 |
| ENSP00000339151 | IKBKB    | 1   | 0.71  |
| ENSP00000344352 | ATF3     | 8   | 0.713 |
| ENSP00000345571 | E2F1     | 5   | 0.713 |
| ENSP00000262367 | CREBBP   | 26  | 0.716 |
| ENSP00000228307 | PXN      | 42  | 0.731 |
| ENSP00000299421 | ILK      | 5   | 0.741 |

|                 |        |     |       |
|-----------------|--------|-----|-------|
| ENSP00000363676 | RPL11  | 12  | 0.754 |
| ENSP00000363822 | AR     | 7   | 0.756 |
| ENSP00000339007 | GRB2   | 226 | 0.759 |
| ENSP00000338799 | IL6ST  | 1   | 0.781 |
| ENSP00000354394 | STAT1  | 17  | 0.784 |
| ENSP00000215832 | MAPK1  | 19  | 0.788 |
| ENSP00000384273 | RELA   | 34  | 0.8   |
| ENSP00000229135 | IFNG   | 4   | 0.804 |
| ENSP00000371067 | JAK2   | 18  | 0.809 |
| ENSP00000371138 | FKBP1A | 2   | 0.816 |
| ENSP00000206249 | ESR1   | 70  | 0.831 |
| ENSP00000360683 | PTPN1  | 5   | 0.833 |
| ENSP00000364133 | TGFBR1 | 2   | 0.862 |
| ENSP00000329357 | SP1    | 28  | 0.864 |
| ENSP00000300574 | CRK    | 1   | 0.896 |
| ENSP00000367207 | MYC    | 4   | 0.915 |
| ENSP00000262160 | SMAD2  | 18  | 0.923 |
| ENSP00000263253 | EP300  | 174 | 0.934 |
| ENSP00000344818 | UBC    | 207 | 0.948 |
| ENSP00000329623 | BCL2   | 22  | 0.966 |
