# Supplementary material for: A Graphic Method for Identification of Novel Glioma Related Genes
Source: Biomed Res Int. 2014 Jun 23;2014:891945. doi: 10.1155/2014/891945 (PMC4094879; doi:10.1155/2014/891945)
Supplement: Supplementary file 1 — The Supplementary Material contains four files. In detail, Supplementary Material I lists 77 glioma related genes; Supplementary Material II lists 215 candidate genes with betweenness greater than 0 and their permutation FDRs; Supplementary Material III lists KEGG enrichment results of 67 selected genes; Supplementary Material IV lists GO enrichment results of 67 selected genes. [file 891945.f1.zip]

Archive with 4 entries (4 files):
- 891945.f1/Supp-I.pdf
- 891945.f1/Supp-II.pdf
- 891945.f1/Supp-III.xlsx
- 891945.f1/Supp-IV.xlsx
